# Supplementary material for: Environmentally friendly loading of palladium nanoparticles on nanoporous PET track-etched membranes grafted by poly(1-vinyl-2-pyrrolidone) via RAFT polymerization for the photocatalytic degradation of metronidazole
Source: RSC Adv. 2023 Jun 20;13(27):18700–14. doi: 10.1039/d3ra03226d (PMC10281340; doi:10.1039/d3ra03226d)
Supplement: RA-013-D3RA03226D-s001 [file RA-013-D3RA03226D-s001.pdf]

**Supplementary Materials:** The following supporting information can be downloaded at:

## Environmentally Friendly Loading of Palladium Nanoparticles on Nanoporous PET Track-Etched Membranes grafted by Poly(1-Vinyl-2-Pyrrolidone) via RAFT Polymerization for the Photocatalytic Degradation of Metronidazole

Nursanat Parmanbek<sup>a,b</sup>, S. Duygu Sütekin<sup>c,d</sup>, Murat Barsbay<sup>c,d</sup>, Nurgulim A. Aimanova<sup>a</sup>, Anastassiya A. Mashentseva<sup>a,e\*</sup>, Alisher M. Zhumabayev<sup>a,b</sup>, Alyona Yanevich<sup>a</sup>, Alimzhan A. Almanov<sup>a,b</sup> and Maxim V. Zdorovets<sup>a,f,g</sup>

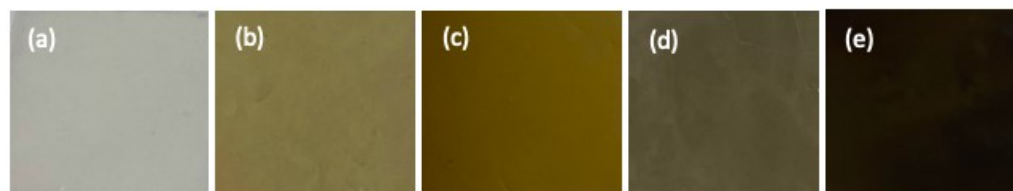

**Figure S1** - The color changing tendency of Pd-loaded PVP-grafted samples by varying reducing agents: a) Pristine PVP-g-PET; b) Pd\_TR@PVP-g-PET by thermal reduction method; c) Pd\_PE@PVP-g-PET by plant extract method; d) Pd\_SBH@PVP-g-PET by Sodium borohydride; e) Pd\_Asc@PVP-g-PET by ascorbic acid.

<sup>a</sup> The Institute of Nuclear Physics of the Republic of Kazakhstan, 050032 Almaty, Kazakhstan. E-mail: [a.mashentseva@inp.kz](mailto:a.mashentseva@inp.kz)

<sup>b</sup> Department of Chemistry, L.N. Gumilyov Eurasian National University, 010008 Astana, Kazakhstan.

<sup>c</sup> Department of Chemistry, Hacettepe University, 06800 Ankara, Turkey

<sup>d</sup> Hacettepe University, Institute of Science, Polymer Science and Technology Division, Beytepe, 06800, Ankara, Turkey

<sup>e</sup> Department of Nuclear physics, new materials and technologies, L.N. Gumilyov Eurasian National University, 010008 Astana, Kazakhstan

<sup>f</sup> Engineering Profile Laboratory, L.N. Gumilyov Eurasian National University, 010008 Astana, Kazakhstan

<sup>g</sup> Department of Intelligent Information Technologies, The Ural Federal University, 620002 Yekaterinburg, Russia

† Footnotes relating to the title and/or authors should appear here.

Electronic Supplementary Information (ESI) available: [details of any supplementary information available should be included here]. See DOI: 10.1039/x0xx00000x

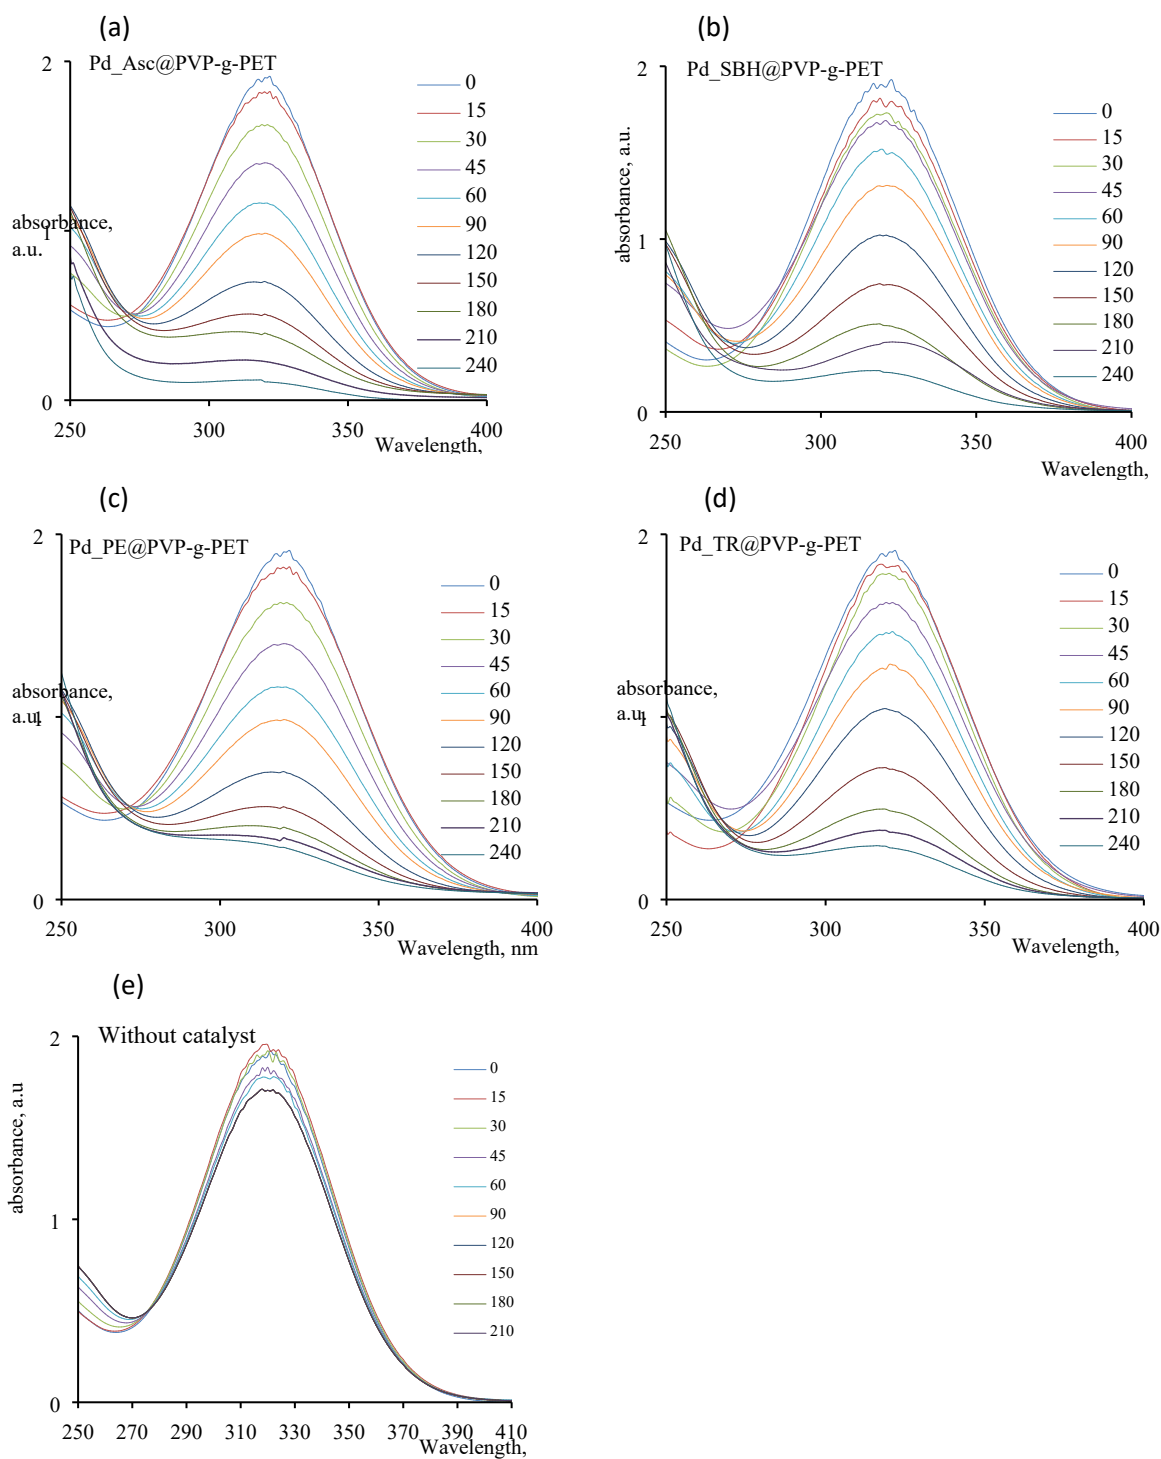

**Figure S2** - Typical absorption spectra for the decomposition reaction of MTZ (30mg/l) in the presence of 1x1 cm Pd\_Asc@PVP-g-PET (a), Pd\_SBH@PVP-g-PET (b), Pd\_PE@PVP-g-PET (c), Pd\_TR@PVP-g-PET (d) composite membranes and without any catalyst (e).
